# Supplementary material
Source: PubMed Central journal article supplement (PMC1458984)

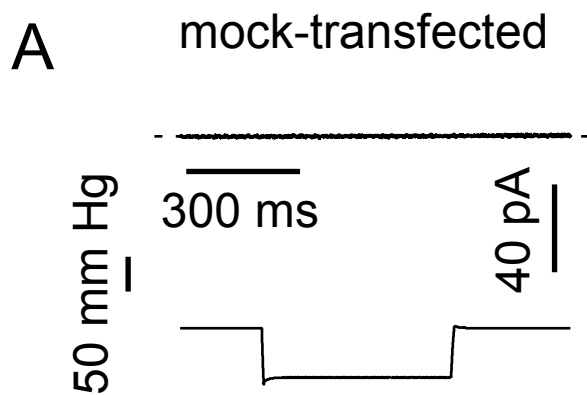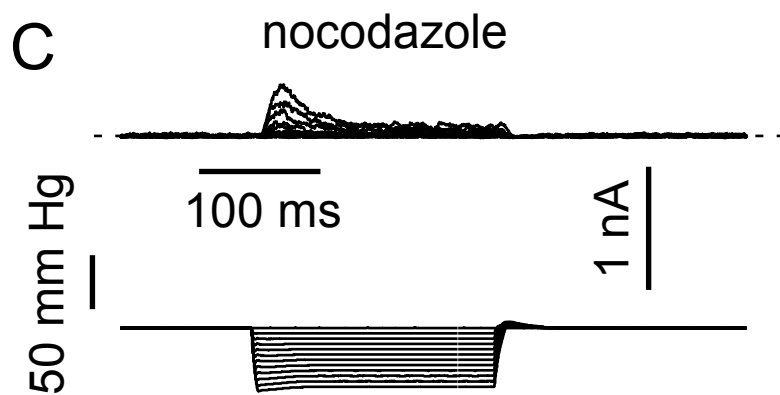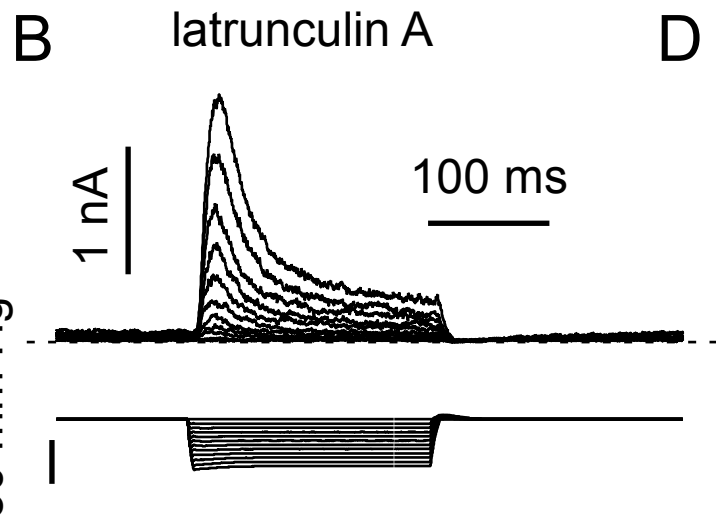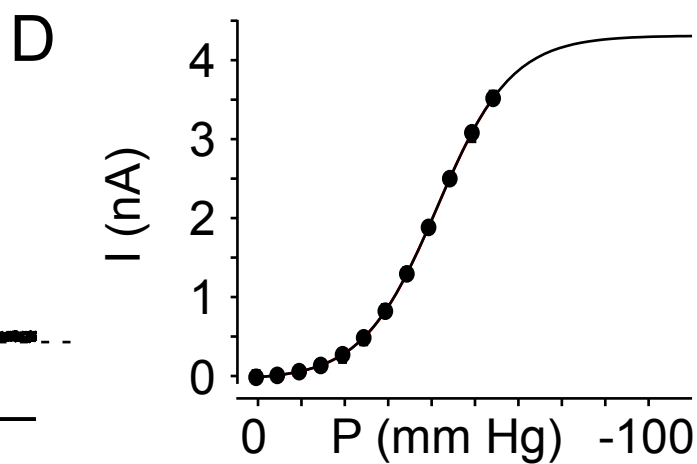

Supplement: pnas_0600463103_1.pdf [file pnas_0600463103_1.pdf]

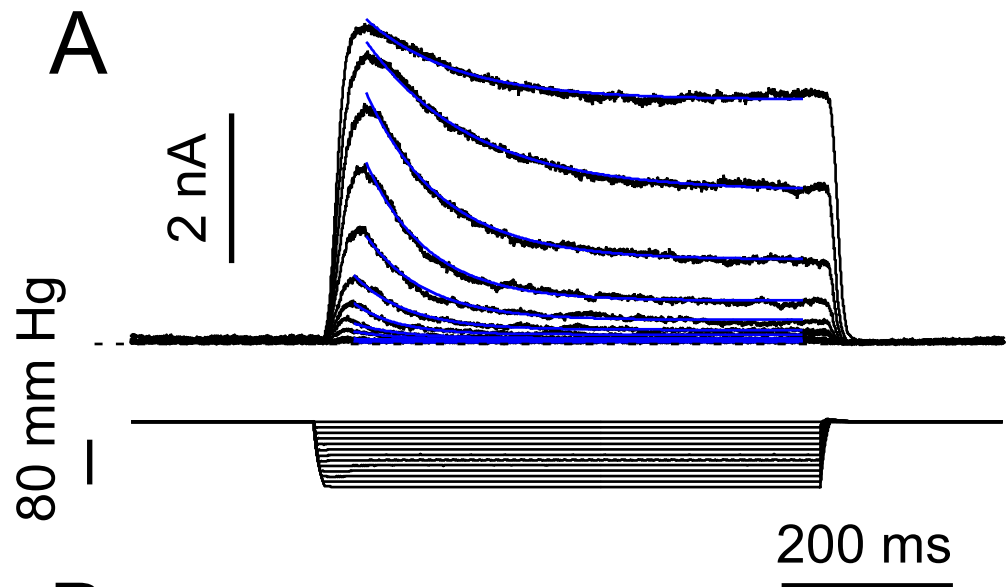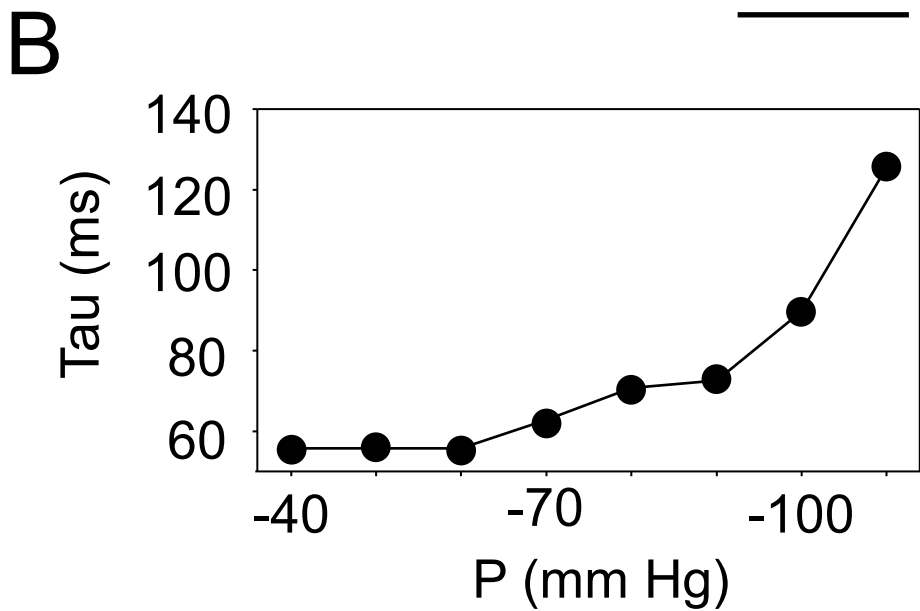

Supplement: pnas_0600463103_2.pdf [file pnas_0600463103_2.pdf]

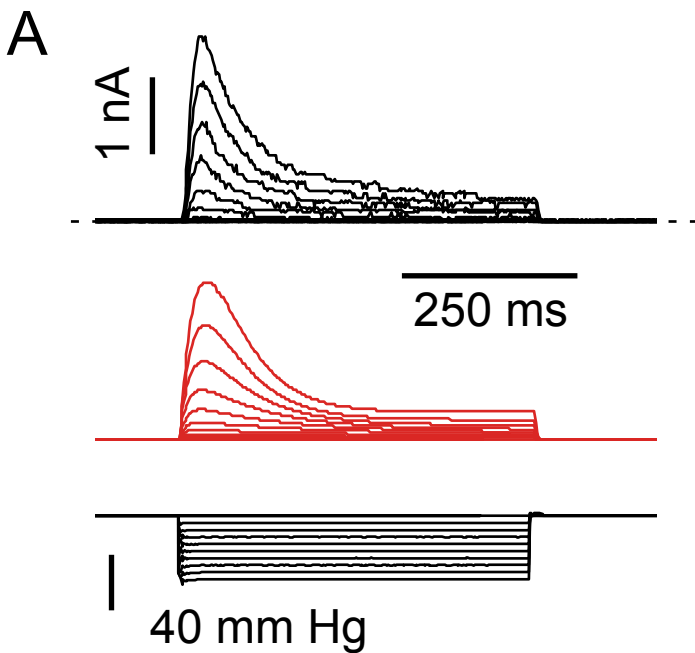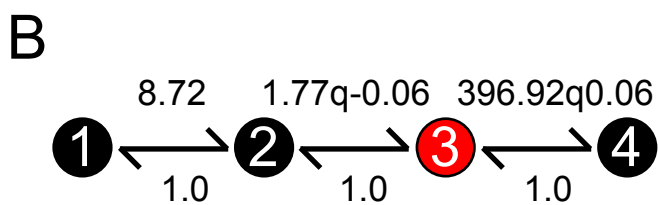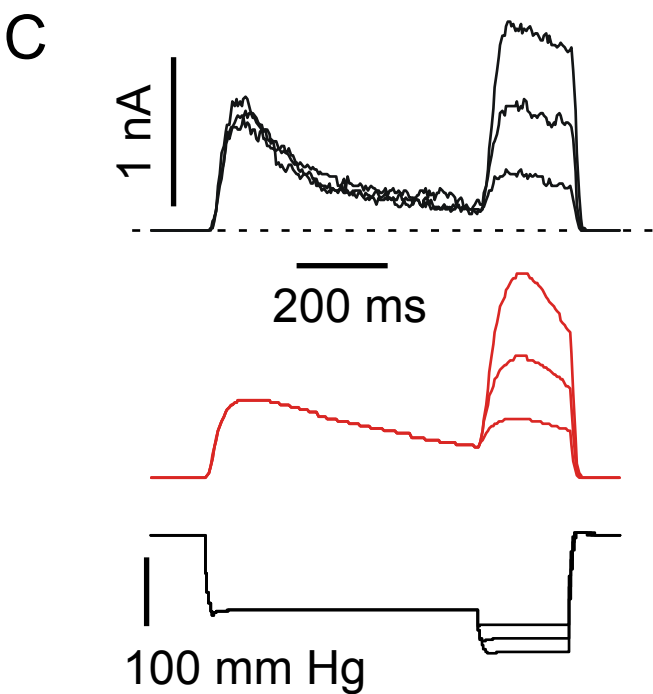

Supplement: pnas_0600463103_3.pdf [file pnas_0600463103_3.pdf]

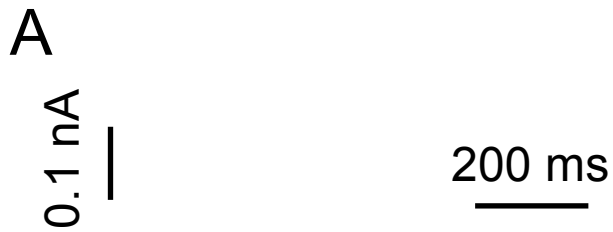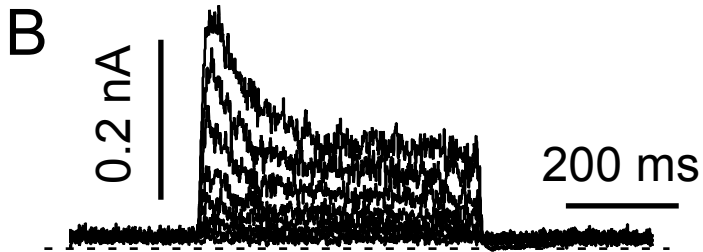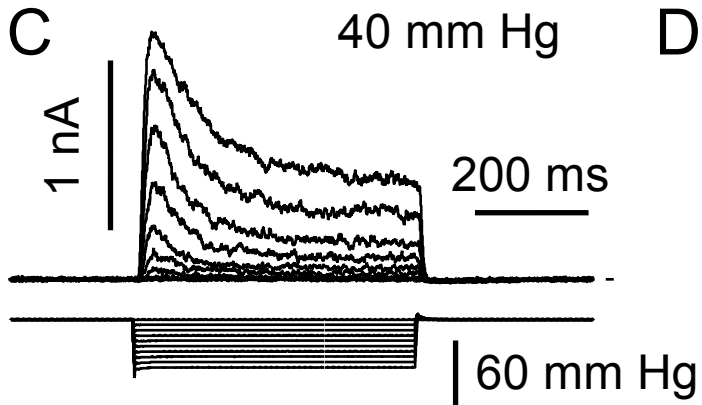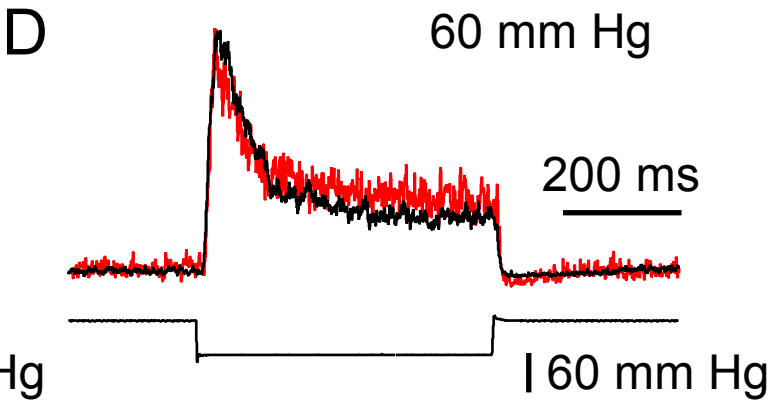

Supplement: pnas_0600463103_4.pdf [file pnas_0600463103_4.pdf]

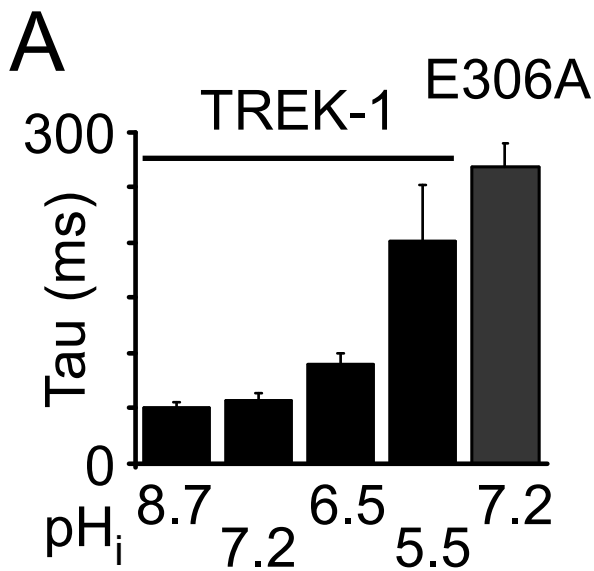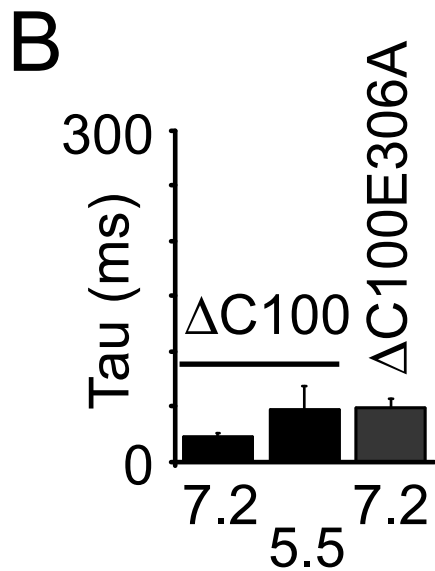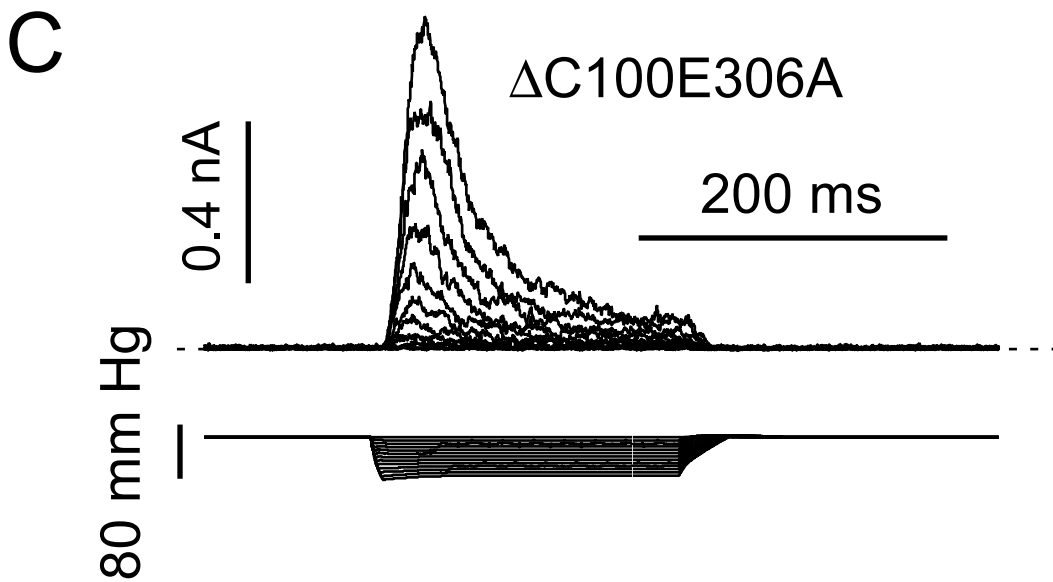

Supplement: pnas_0600463103_5.pdf [file pnas_0600463103_5.pdf]

0 mm Hg

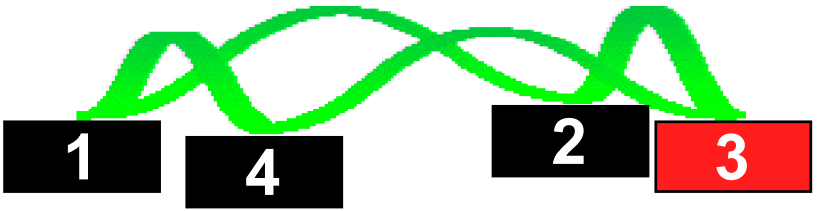

-50 mm Hg

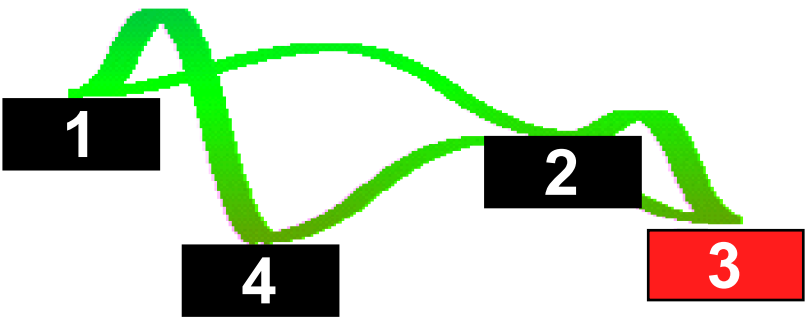

-100 mm Hg

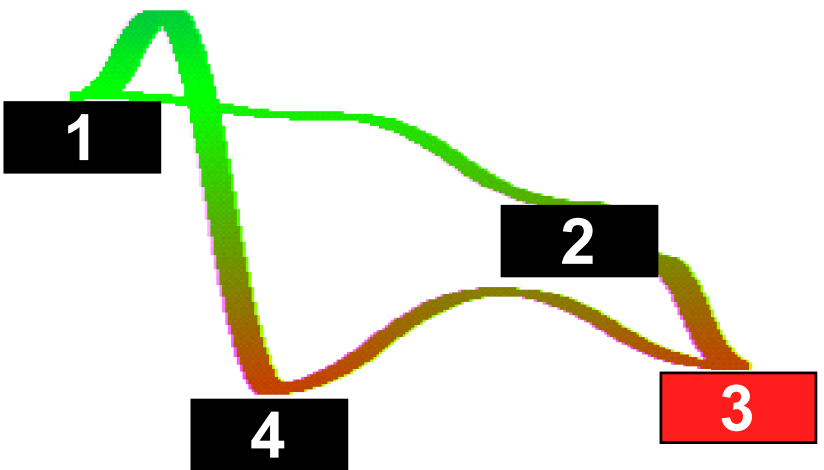

Supplement: pnas_0600463103_6.pdf [file pnas_0600463103_6.pdf]
